# Supplementary material for: Comparative NMR metabolomics of the responses of A2780 human ovarian cancer cells to clinically established Pt-based drugs
Source: Royal Society of Chemistry journal article supplement (doi:10.1039/d2dt02068h), 2022-01-01
Supplement: d2dt02068h1.pdf [file d2dt02068h1.pdf]

# Comparative NMR metabolomics of the responses of A2780 human ovarian cancer cells to clinically established Pt-based drugs

Veronica Ghini, Francesca Magherini, Lara Massai, Luigi Messori and Paola Turano

## Electronic Supplementary Information (ESI)

### Table of contents

|           |        |
|-----------|--------|
| Table S1  | Pg. S2 |
| Figure S1 | Pg. S4 |
| Figure S2 | Pg. S5 |

**Table S1.** List of assigned and quantified metabolites in cell lysates (endo-) and growing media (exo-) with the respective HMDB code and the <sup>1</sup>H NMR resonance assignment; s= singlet; d= doublet; t=triplet; dd= doublet of doublets; ddd= doublet of doublets of doublets; dt= doublet of triplets; m= multiplet.

| Metabolites           | Endo- | Exo- | HMDB ID                                   | NMR assignment                                                                             |
|-----------------------|-------|------|-------------------------------------------|--------------------------------------------------------------------------------------------|
| 4-Hydroxy-L-proline   | x     | x    | HMDB0000725                               | 2.14 (m); 2.42 (m);<br>3.36 (m); 3.46 (ddd);<br>4.33 (dd); 4.67 (m)                        |
| Acetate               | x     | x    | HMDB0000042                               | 1.93 (s)                                                                                   |
| Adenosine-X-phosphate | x     |      | HMDB0000045<br>HMDB0001341<br>HMDB0000538 | 8.61 (s)                                                                                   |
| L-Aspartate           |       | x    | HMDB0000191                               | 2.67 (m); 2.83 (m);<br>3.87 (m)                                                            |
| Choline               | x     |      | HMDB0000097                               | 3.19 (s); 3.51 (dd);<br>4.06 (m)                                                           |
| Citrate               |       | x    | HMDB0000094                               | 2.66 (d); 2.52 (d)                                                                         |
| Creatine              | x     |      | HMDB0000064                               | 3.02 (s); 3.92 (s)                                                                         |
| D-Glucose             | x     | x    | HMDB0000122                               | 3.23 (dd); 3.40 (m);<br>3.46 (m); 3.52 (dd);<br>3.73 (m); 3.82 (m);<br>3.89 (dd); 4.63 (d) |
| Ethanol               | x     | x    | HMDB0000108                               | 1.17 (t); 3.65 (q)                                                                         |
| Formate               | x     | x    | HMDB0000142                               | 8.45 (s)                                                                                   |
| Fumarate              | x     | x    | HMDB0000134                               | 6.51 (s)                                                                                   |
| Glutathione           | x     |      | HMDB0000125                               | 2.16 (m); 2.54 (m);<br>2.97 (dd); 3.78 (m);<br>4.20 (q)                                    |
| Glycerophosphocholine | x     |      | HMDB0000086                               | 3.20 (s); 3.64 (m)<br>3.90 (m); 4.30 (m)                                                   |
| Glycine               | x     | x    | HMDB0000123                               | 3.54 (s)                                                                                   |
| Guanosine-X-phosphate | x     |      | HMDB0001397<br>HMDB0001201<br>HMDB0001273 | 5.93 (d)                                                                                   |
| Lactate               | x     | x    | HMDB0000190                               | 1.32 (d); 4.10 (q)                                                                         |
| L-Alanine             | x     | x    | HMDB0000161                               | 1.47 (d); 3.77 (q)                                                                         |
| L-Arginine            |       | x    | HMDB0000517                               | 1.68 (m); 1.90 (m);<br>3.23 (t); 3.76 (t)                                                  |
| L-Asparagine          | x     | x    | HMDB0000168                               | 2.67 (m); 2.83 (m);<br>3.87 (dd)                                                           |
| L-Cystine             |       | x    | HMDB0000192                               | 3.18 (dd); 3.37 (dd);<br>4.10 (dd)                                                         |
| L-Glutamate           | x     | x    | HMDB0000148                               | 2.04 (m); 2.12 (m);<br>2.34 (m); 3.75 (dd)                                                 |
| L-Glutamine           | x     | x    | HMDB0000641                               | 2.12 (m); 2.45 (m);<br>3.77 (t)                                                            |

|                            |   |   |             |                                                                                                                                                    |
|----------------------------|---|---|-------------|----------------------------------------------------------------------------------------------------------------------------------------------------|
| L-Histidine                |   | x | HMDB0000177 | 3.16 (dd); 3.23 (dd);<br>3.98 (dd); 7.09 (d);<br>7.9 (d)                                                                                           |
| L-Isoleucine               | x | x | HMDB0000172 | 0.93 (t); 1.00 (d); 1.25<br>(m); 1.46 (m); 1.97<br>(m); 3.66 (d)                                                                                   |
| L-Leucine                  | x | x | HMDB0000687 | 0.95 (t); 1.70 (m);<br>3.72 (m)                                                                                                                    |
| L-Lysine                   | x | x | HMDB0000182 | 1.46 (m); 1.71 (m);<br>1.89 (m); 3.02 (t);<br>3.74 (t)                                                                                             |
| L-Methionine               |   | x | HMDB0000696 | 2.16 (m); 2.63 (t);<br>3.85 (dd)                                                                                                                   |
| L-Ornithine                |   | x | HMDB0000214 | 1.80 (m); 1.93 (m);<br>3.04 (m); 3.77 (m)                                                                                                          |
| L-Phenylalanine            |   | x | HMDB0000159 | 3.11 (m); 3.27 (m);<br>3.98 (m); 7.37 (m)                                                                                                          |
| L-Proline                  | x | x | HMDB0000162 | 2.00 (m); 2.08 (m);<br>2.34 (m); 3.32 (dt);<br>3.41 (m); 4.12 (dd)                                                                                 |
| L-Serine                   |   | x | HMDB0000187 | 3.83 (dd); 3.96 (m)                                                                                                                                |
| L-Tyrosine                 | x | x | HMDB0000158 | 3.02 (dd); 3.17 (dd);<br>3.92; (dd); 6.88 (m);<br>7.17 (m)                                                                                         |
| L-Valine                   | x | x | HMDB0000883 | 0.98 (d); 1.03 (d);<br>2.26 (m); 3.60 (d)                                                                                                          |
| Methanol                   | x |   | HMDB0001875 | 3.34 (s)                                                                                                                                           |
| Myo-inositol               | x | x | HMDB0000211 | 3.27 (t); 3.54 (dd);<br>3.61 (t); 4.05 (t)                                                                                                         |
| Niacinamide                | x |   | HMDB0001406 | 7.58 (dd); 8.23 (dd);<br>8.70 (dd); 8.92 (s)                                                                                                       |
| Phosphocholine             | x |   | HMDB0001565 | 3.21 (s); 3.59 (m);<br>4.19 (m)                                                                                                                    |
| Phosphocreatine            | x |   | HMDB0001511 | 3.03 (s); 3.94 (s)                                                                                                                                 |
| Pyroglutamate              |   | x | HMDB0000267 | 2.02 (m); 2.39 (m);<br>2.50 (m); 4.17 (dd)                                                                                                         |
| Pyruvate                   |   | x | HMDB0000243 | 2.37 (s)                                                                                                                                           |
| Succinate                  | x |   | HMDB0000254 | 2.41 (s)                                                                                                                                           |
| UDP-N-acetyl-galactosamine | x |   | HMDB0060522 | 2.04 (s); 3.49 (dt);<br>3.72 (dd); 3.90 (dd);<br>4.02 (dd); 4.12 (d);<br>4.20 (ddd); 4.25<br>(ddd); 4.37 (dd); 5.63<br>(dd); 5.97 (d); 7.95<br>(d) |
| UDP-N-Acetyl-glucosamine   | x |   | HMDB0000290 | 2.07 (s); 3.54 (t); 3.80<br>(m); 3.91 (m); 3.98<br>(m); 4.17 (m); 4.23<br>(m); 4.27 (m); 4.35                                                      |

|  |  |  |  |                                                 |
|--|--|--|--|-------------------------------------------------|
|  |  |  |  | (m); 5.50 (dd); 5.96<br>(m); 7.93 (t); 8.32 (d) |
|--|--|--|--|-------------------------------------------------|

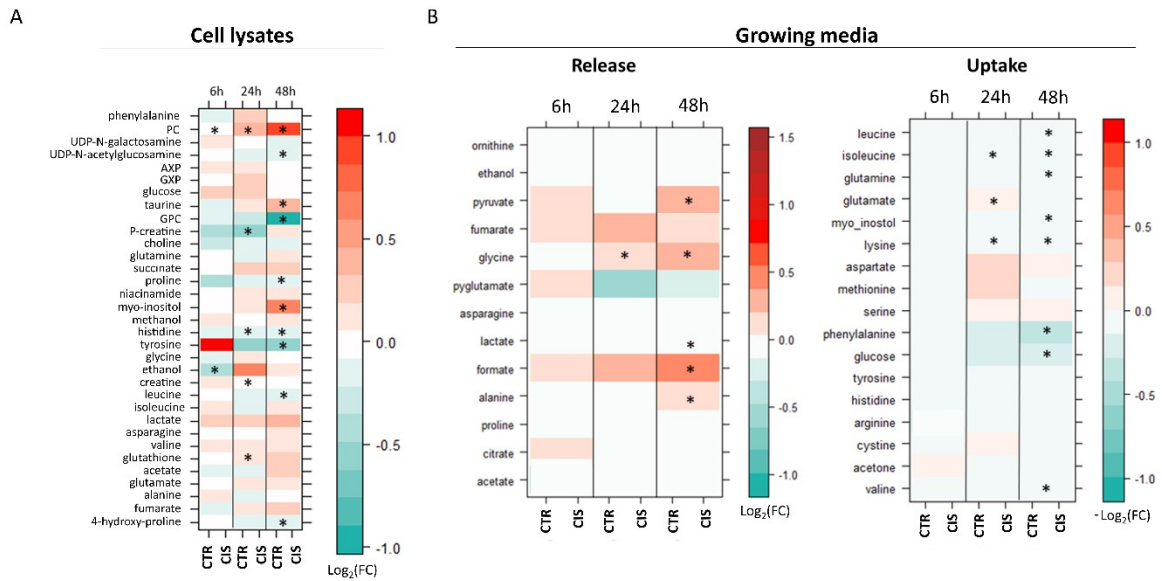

**Figure S1.** Level plots of Fold Change for cisplatin at 6 h, 24 h and 48 h of treatment; A) Cell lysates: red/green parameters indicate higher/lower concentration in CIS-treated cells with respect to controls samples ( $\text{Log}_2(\text{FC})$ ). B) growth media: red/green parameters indicate higher/lower release ( $\text{Log}_2(\text{FC})$ ) or uptake ( $-\text{Log}_2(\text{FC})$ ), respectively, in CIS-treated cells with respect to controls samples. The brightness of the colors corresponds to the magnitude of the FC. Asterisks indicate statistical significance ( $p\text{-value} < 0.05$ ).

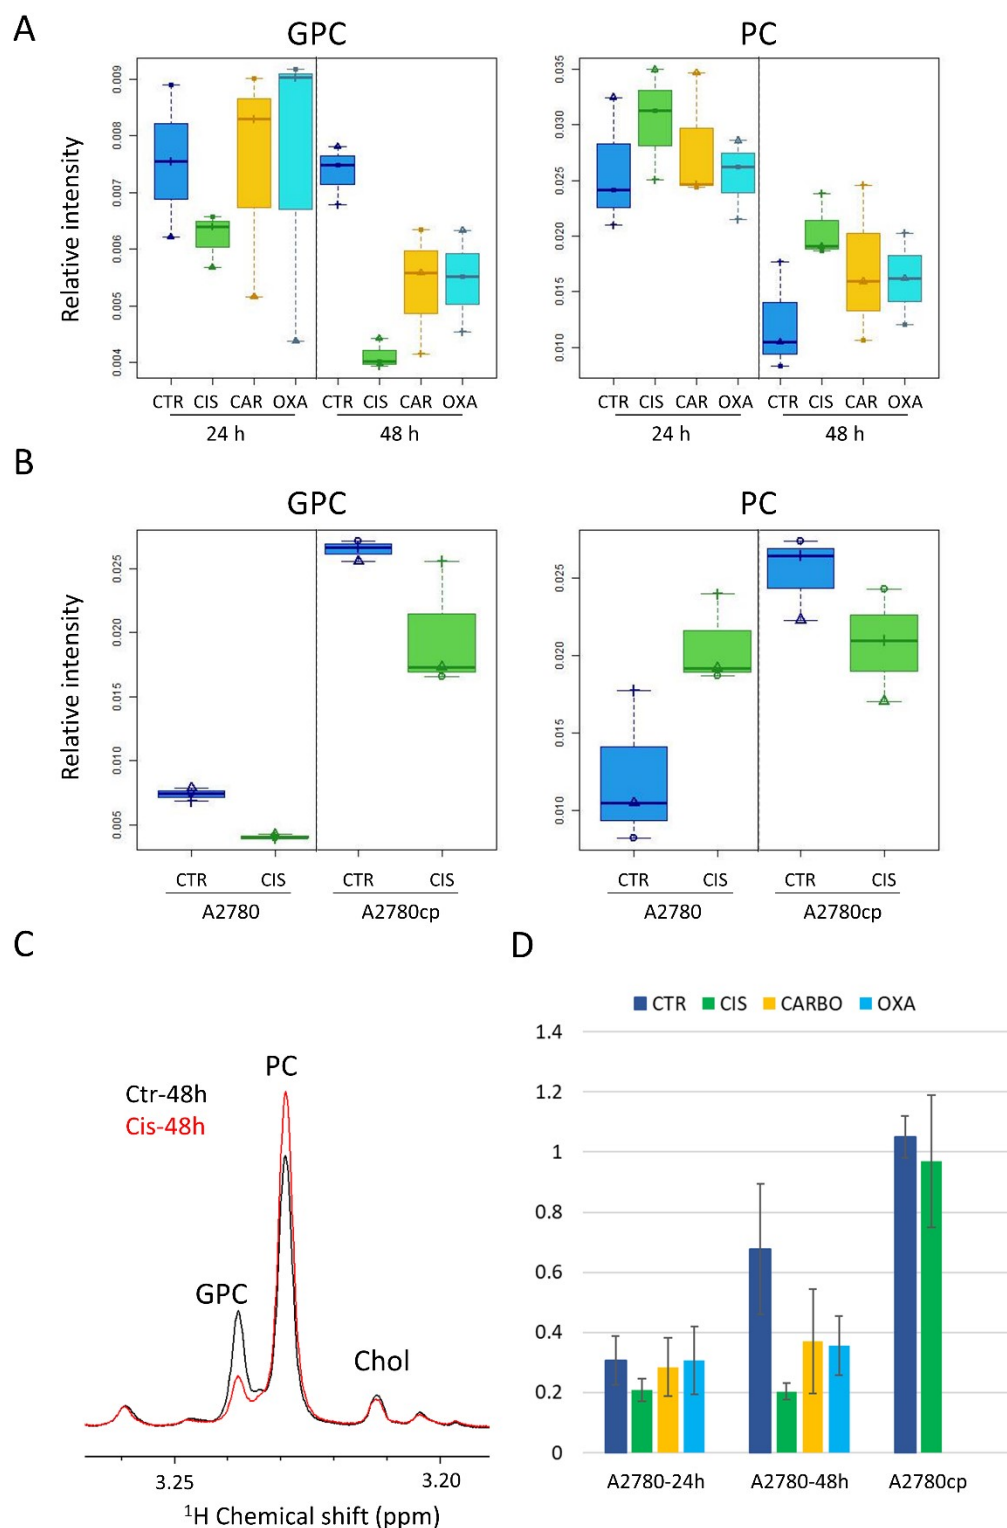

**Figure S2.** Changes in the levels of glycerophosphocholine (GPC) and phosphocholine (PC) as a function of the different treatments and/or in different cell lines. *A*) Boxplots of the GPC and PC levels at 24 h and 48 h in: control (blue), CIS- (yellow), CARBO- (orange) and OXA-treated (cyan) A2780 cells. *B*) Boxplots of the GPC and PC levels at 48 h in control (blue) and CIS-treated (green) in A2780 and A2780cp cells. *C*) Representative  $^1\text{H}$  NMR spectral region containing choline-derivatives signals: control (black trace), CIS-treated (red trace) recorded

*for A2780 lysates at 48 h. D) GPC/PC ratio for control (blue bars), CIS- (yellow bars), CARBO- (orange bars) and OXA-treated (cyan bars) A2780 and A2780cp cells. For A2780cp cells, the results of CIS treatment are referred to the condition of equal toxicity.*
